# Supplementary material for: Nur77 deficiency leads to systemic inflammation in elderly mice
Source: Springer Nature journal article supplement (doi:10.1186/s12950-015-0085-0), 2015-06-26

# Figure S1

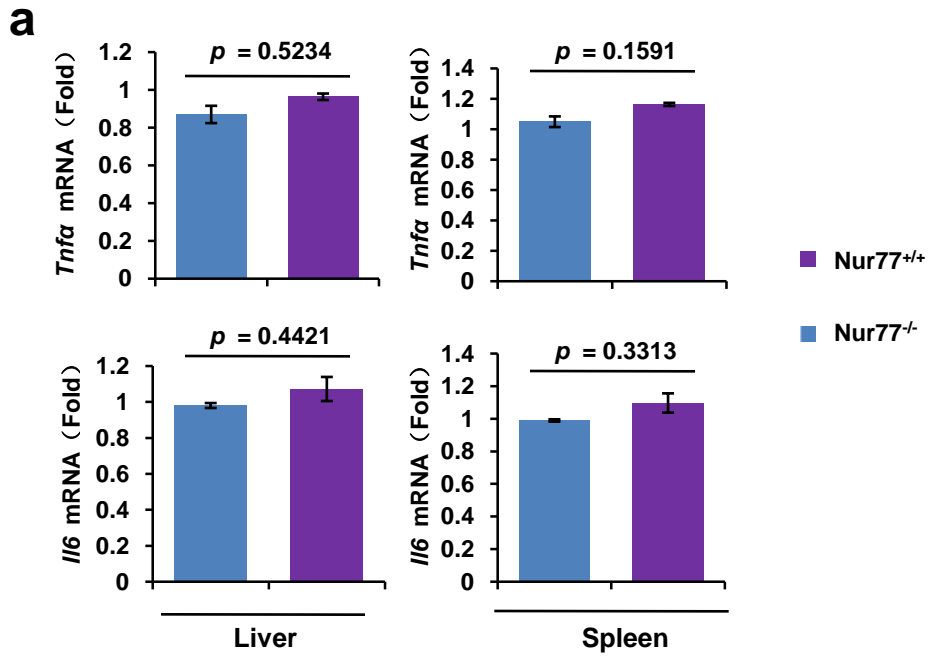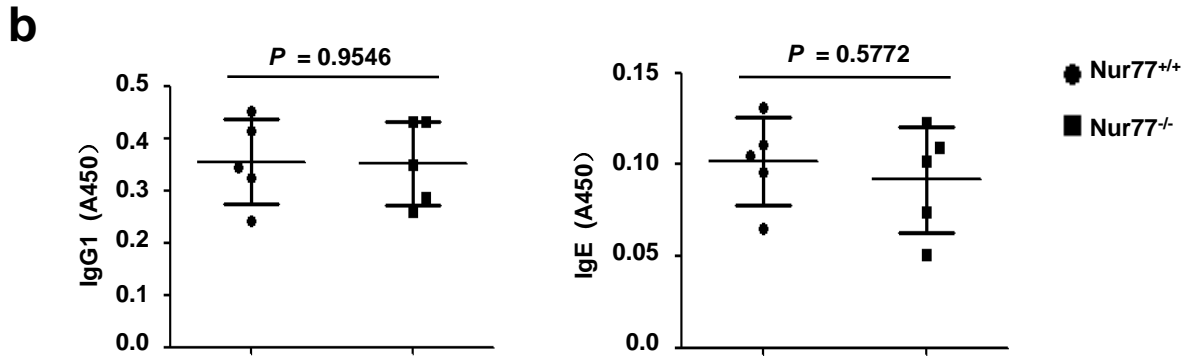

Supplement: MOESM1 [file 9763674]
